1 **FULL TITLE: Perceptions and compliance with COVID-19 preventive**  
2 **measures in Southern and Central regions of Mozambique: a quantitative**  
3 **in-person household survey in the districts of Manhiça and Quelimane**

4  
5 **SHORT TITLE: Perceptions and compliance with COVID-19 preventive**  
6 **measures in Mozambique**

7  
8 **Authors list:**

9 Ariel Nhacolo<sup>1\*</sup>, Amílcar Magaço<sup>1</sup>, Felizarda Amosse<sup>1</sup>, Aura Hunguana<sup>1</sup>, Teodomiro  
10 Matsena<sup>1</sup>, Arsénio Nhacolo<sup>1</sup>, Elisio Xerinda<sup>1</sup>, Quique Bassat<sup>1,2,3,4,5</sup>, Charfudin Sacoor<sup>1</sup>,  
11 Inácio Mandomando<sup>1,6</sup>, Khátia Munguambe<sup>1,7</sup>

12 **Affiliations:**

13  
14 <sup>1</sup> Centro de Investigação em Saúde de Manhiça (CISM), Maputo, Mozambique

15 <sup>2</sup> ISGlobal, Hospital Clínic - Universitat de Barcelona, Barcelona, Spain

16 <sup>3</sup> ICREA, Pg. Lluís Companys 23, 08010 Barcelona, Spain.

17 <sup>4</sup> Pediatrics Department, Hospital Sant Joan de Déu, Universitat de Barcelona, Barcelona, Spain

18 <sup>5</sup> Consorcio de Investigación Biomédica en Red de Epidemiología y Salud Pública (CIBERESP),  
19 Madrid, Spain

20 <sup>6</sup> National Institute of Health, Ministry of Health, Maputo, Mozambique

21 <sup>7</sup> Faculty of Medicine, Eduardo Mondlane University, Maputo, Mozambique

22  
23 \* Corresponding author: Ariel Nhacolo; e-mail: [ariel.nhacolo@manhica.net](mailto:ariel.nhacolo@manhica.net). Centro de  
24 Investigação em Saúde de Manhiça (Manhiça Health Research Center), Rua 12, Bairro Cambeve,  
25 Município da Vila da Manhiça, Manhiça District

26  
27 **Emails of Authors**

28 [Ariel.nhacolo@manhica.net](mailto:Ariel.nhacolo@manhica.net)

29 [Amilcar.magaco@manhica.net](mailto:Amilcar.magaco@manhica.net)

30 [Felizarda.amosse@manhica.net](mailto:Felizarda.amosse@manhica.net)

31 [Aura.hunguana@manhica.net](mailto:Aura.hunguana@manhica.net)

32 [Teodomiro.matsena@manhica.net](mailto:Teodomiro.matsena@manhica.net)

33 [Arsenio.nhacolo@manhica.net](mailto:Arsenio.nhacolo@manhica.net)

34 [Elisio.xerinda@manhica.net](mailto:Elisio.xerinda@manhica.net)

35 [quique.bassat@isglobal.org](mailto:quique.bassat@isglobal.org)

36 [Charfudin.sacoor@manhica.net](mailto:Charfudin.sacoor@manhica.net)

37 [Inacio.mandomando@manhica.net](mailto:Inacio.mandomando@manhica.net)

38 [Khatia.munguambe@manhica.net](mailto:Khatia.munguambe@manhica.net)

NOTE: This preprint reports new research that has not been certified by peer review and should not be used to guide clinical practice.

39

## 40 **ABSTRACT**

41

### 42 **Background**

43 The COVID-19 pandemic has led countries into urgent implementation of stringent  
44 preventive measures at the population level. However, implementing these measures in  
45 low-income countries like Mozambique was incredibly difficult, coupled with lack of  
46 scientific evidence on the community understanding and compliance with these measures.  
47 This study assessed the perceptions and implementation of COVID-19 preventive measures  
48 recommended by Mozambican authorities in Manhiça and Quelimane districts, taking  
49 confinement, social distancing, frequent handwashing, mask wearing, and quarantine as  
50 the key practices to evaluate.

### 51 **Methods**

52 A quantitative survey interviewing households' heads in-person was conducted in October  
53 2020 and February 2021; collecting data on perceptions of COVID-19, symptoms, means of  
54 transmission/prevention; including self-evaluation of compliance with the key measures,  
55 existence of handwashing facilities, and the ratio of face-masks per person. The analysis  
56 presents descriptive statistics on perceptions and compliance with anti-COVID-19  
57 measures at individual and household levels, comparing by district and other variables. T-  
58 test was performed to assess the differences on proportions between the districts or  
59 categories of respondents in the same district.

60

61

## 62 **Results**

63 The study interviewed 770 individuals of which 62.3% were heads of households, 18.6%  
64 their spouses, and 11.0% sons/daughters. Most participants (98.7%) had heard of COVID-  
65 19 disease. The most difficult measure to comply with was staying at home (35.8% of  
66 respondents said they could not comply with it at all); followed by avoiding touching the  
67 mouth/nose/eyes (28.7%), and social distancing at home (27.3%). Mask wearing in public  
68 places was the measure that more respondents (48.8%) thought they complied 100% with  
69 it, followed by avoiding unnecessary traveling (40.0%), avoiding crowded places (34.0%), and  
70 social distancing outside home (29.0%). Only 30.4% of households had handwashing  
71 devices or disinfectant (36.7% in Manhiça and 24.1% in Quelimane); and of those with  
72 devices, only 41.0% had water in the device, 37.6% had soap, and 22.6% had other  
73 disinfectant. The ratio of masks per person was only 1, which suggests that people may  
74 have used the same mask for longer periods than recommended.

## 75 **Conclusions**

76 Community members in Manhiça and Quelimane were aware of COVID-19 but they lacked  
77 understanding for implementing the preventive measures. This, together with socio-  
78 economic constraints, led to lower levels of compliance with the key measures.  
79 Understanding and addressing the factors affecting proper implementation of these  
80 measures is crucial for informing decision-makers about ways to improve community  
81 knowledge and practices to prevent infectious diseases with epidemic potential.

82  
83  
84  
85  
86  
87

## 88           **1. INTRODUCTION**

89       Since COVID-19 was declared a pandemic disease (1), different approaches to contain the  
90       spread of the virus have been adopted around the world, with countries taking stringent  
91       measures which included, among others, closing the borders, banning incoming flights,  
92       shutting down institutions and non-essential services, curfews, restriction on opening  
93       hours of major services, enforcing quarantines to the infected and potential contacts, as  
94       well as extreme measures such as complete population lock-down (2)(3). While the  
95       implementation of these measures in high-income countries was already challenging, in  
96       low-income countries like Mozambique they represented an incredible conundrum.  
97       Mozambique initially declared level 3 State of Emergency, which included measures such  
98       as closing down educational institutions, interrupting visa services, limiting mobility,  
99       limiting gatherings to a maximum of 50 people and recommending a minimum distance of  
100       1.5 meters between individuals. Later on, gatherings were limited to a maximum of 10  
101       people and the use of masks was recommended on crowded places and public transport  
102       vehicles (4). The Mozambican Government focused on prevention, recognising that the  
103       health care system was far from being capable of responding to a massive number of  
104       COVID-19 patients, should the pandemic reach its peak early and abruptly (4).

105           However, and even during the harshest restriction periods, while facing hard  
106       confinement measures, there were reports, on the media, of crowded public transports,  
107       markets and streets, and of people not having interrupted activities such as working, or  
108       trading or travelling for the sake of their families' livelihood (5). For the same reasons of  
109       self and family survival, there were indications that the "stay at home" principle was  
110       challenging to an important segment of the population, who lives on the basis of a daily  
111       income (6). Little is known about whether and how the communities understood and

112 implemented the measures recommended for preventing or reducing the spread of COVID-  
113 19 in Mozambique.

114 Understanding the gaps in knowledge and compliance with measures against the  
115 spread of COVID-19 in Southern and Central Mozambique would confer the opportunity to  
116 develop more effective and socio-culturally appropriate sensitization initiatives to address  
117 the need of COVID-19 prevention. This study aimed to assess the perceptions and  
118 implementation of the measures recommended by the government of Mozambique to  
119 prevent COVID-19 in rural and urban settings of Southern and Central Mozambique  
120 (Manhiça and Quelimane districts), taking confinement, social distancing, hand washing,  
121 mask wearing, and quarantine as the key practices to assess. Data such as these, from both  
122 rural and urban areas and from two socio-economically different region of the country,  
123 were crucial for informing decision-makers about ways to improve community knowledge  
124 and practices regarding prevention of COVID-19 or any other future infectious disease with  
125 epidemic potential.

126

## 127 **2. METHODS**

### 128 **2.1. Study design**

129 This study was a cross-sectional quantitative household survey designed to collect data  
130 both at individual and household level, through interviews administered in-person to the  
131 heads of households or their representatives, gathering their perceptions and practices  
132 regarding anti-COVID-19 measures and in the context of their households.

### 133 **2.2. Study setting and population**

134 The study took place in two locations: (i) Manhiça district, a mainly rural setting located in  
135 Province Maputo, in the Southern region of Mozambique; and (ii) Quelimane district, in  
136 the Central province of Zambézia, which comprises urban and rural settings (Figure 1).  
137 Manhiça district is 85 km North of Maputo City, the capital of Mozambique, and was  
138 purposively selected because of the presence of the Manhiça Health Research Center  
139 (CISM). CISM has been conducting biomedical research in the district over nearly 25 years,  
140 which has facilitated the implementation of the study in a context of emergency with  
141 relatively less challenges than it would have been elsewhere in rural Mozambique.

142 Similarly, the district of Quelimane was chosen because CISM has been conducting  
143 biomedical research there for 5 years, particularly on causes of deaths using minimally  
144 invasive tissue sampling (7). Currently, CISM is establishing an HDSS in the district.  
145 Quelimane is located along the river Rio dos Bons Sinais in the Southern part of Zambézia  
146 province. The district has urban and rural settings. The urban area comprises the City of  
147 Quelimane (the capital of Zambézia province), where live 71.7% of the total 349,842 district  
148 population (8).

149 The study population comprised heads of households or their representatives that  
150 were residents in the study area, as defined by the CISM's HDSS, i.e. those who live in a  
151 household in Manhiça or in Quelimane districts for three or more months or are entering  
152 the district with intention for that (9). The survey adopted, also, the HDSS definition of  
153 household, as a group of one or more individuals who live together in the same house or  
154 group of houses, eat together, share domestic expenses, and acknowledge one of them as  
155 their head or leader (9). The head of a household is the member who takes the most  
156 important day-to-day decisions in the household and is the reference member (9).

157

158 **Figure 1.** Location and administrative division of Manhiça and Quelimane districts.

159 Source: Manhiça and Quelimane HDSS databases (2022) and (10).

160

### 161 **2.3. Sampling and sample size**

162 In Manhiça, the survey used the HDSS database as a sampling frame to randomly select a

163 sample of households that was representative at the level of Administrative Posts. In

164 Quelimane the sampling frame was a list of households given by the local authorities.

165 Although the study had multiple outcomes of interest at household level, the presence of

166 a handwashing facility with water and soap was considered as the main variable for

167 estimating the minimum sample size of households for this study. A handwashing facility

168 was defined as a device to contain, transport or regulate the flow of water to facilitate

169 handwashing (11) - a commonly used proxy indicator of actual handwashing practice,

170 which has been found to be more accurate than other proxies such as self-reports of hand

171 washing practices. Because there were no data on the proportion of households with a

172 handwashing facility during the pandemic in Mozambique, the sample size was calculated

173 to estimate a proportion of 50% with a margin of error of 5% and confidence level of 95%

174 (12). Thus, it was estimated that a sample size of 385 households for each district would

175 be sufficient to estimate this proportion (a sample size calculated this way is also suitable

176 to estimate proportions ranging from 10% to 90%) (12). At the individual level, the main

177 outcome was defined as the proportion of individuals who wash their hands at critical

178 points in time, but because there were no data for the pandemic period, the sample size

179 was calculated to estimate a proportion of 50% of people washing their hands, with a

180 margin of error of 5% and confidence level of 95%, which resulted in a sample size of 385

181 individuals for each district. Thus, because the sample size for households coincided with

182 that of individuals, the data for the two units of analysis (individual and household) were  
183 collected by asking the questions to the same respondent, i.e. one respondent per  
184 household.

#### 185 **2.4. Data collection and quality assurance**

186 The data were collected in October 2020 in Manhiça and in February 2021 in Quelimane,  
187 using paper-based questionnaires that were verified by demographers for consistencies  
188 and completeness, and were double-entered to reduce typing errors at CISM’s Data  
189 Center. Forms with errors were returned to the field for corrections. The interviewers were  
190 selected from the HDSS fieldworkers (supervisors and other well-experienced  
191 fieldworkers) who were carefully trained for this survey. The training included refreshing  
192 the training that they had previously received on biosafety measures in the context of the  
193 coronavirus pandemic, as part of CISM’s requirements. The survey questionnaire was  
194 designed to collect the following data:

195 *Perceptions and level of compliance with COVID-19 preventive measures* – using  
196 questions framed to capture knowledge and understanding of the disease, details of  
197 symptoms, means of transmission and prevention, definitions of preventive measures, and  
198 level of compliance with anti-COVID-19 measures. Thus, questions such as “have you ever  
199 heard of coronavirus?”; “have you ever heard of COVID-19?”; “if YES, what it is?”; “what are  
200 the symptoms or signs of Coronavirus or COVID-19?”; “how is this disease transmitted?”;  
201 and “how can we prevent it?” were asked. To assess the understanding of anti-COVID-19  
202 measures, respondents were asked the following questions: “could you please explain  
203 what does social distancing means?”; “could you explain what it means to always wear face  
204 mask?”; “what it means to avoid touching the mouth/nose/eyes?”; “what does quarantine



205 means?"; "what it means to avoid crowded places?"; "what it means to avoid travelling?".  
206 This included questions for self-evaluation of compliance with the key measures  
207 considered in this study. The respondents were asked to grade themselves in a scale of 0%  
208 to 100%, where 0% meant that they did not comply at all with a specific measure, and 100%  
209 when they thought they complied completely with a given measure. Most of the questions  
210 had pre-defined answers for the interviewer to mark all the respondent's answers (multiple  
211 options). The interviewers were instructed to ask the respondent "anything else?"  
212 repeatedly when the respondent stopped stating their responses, to explore the  
213 information as much as possible. There were open-ended questions and, for close-ended  
214 questions there were spaces for the interviewers to write all the responses that did not  
215 match the pre-defined options.

216 Implementation of COVID-19 preventive measures at household level - this included  
217 source of water to understand the presence and functioning of a handwashing facility, the  
218 capacity to keep 1.5 meters apart inside the household premises, number of face masks in  
219 the household; and compliance with quarantine for members or visitors who had contact  
220 with suspected cases. The fieldworkers were instructed to observe/verify the existence and  
221 functioning of a hand washing facility in the household (presence of water, soap and/or  
222 ashes), as recommend by the guidelines for collecting data on handwashing facilities (11).  
223 Ashes were recommended by the government for handwashing where there is no soap  
224 (13).

225 Symptoms of respiratory illness at household and community levels – the household  
226 heads were asked whether they had had any symptom of respiratory illness since 05 March  
227 2020, when COVID-19 was first declared in South Africa; whether they or any member of  
228 the household had respiratory symptoms on the day of interview; and whether they knew

229 about anyone with such symptoms in their neighbourhoods. The date when COVID-19 was  
230 first declared in South Africa was used as starting point because there were reports, on the  
231 media, of unprecedented inflow of Mozambicans returning from South Africa as the South  
232 African government had announced that would close the borders due to COVID-19; and  
233 this inflow was seen as a potential source for importing Coronavirus into Mozambique (5).

234 Perceived hardships due to COVID-19 - the respondents were asked “in this problem  
235 of Coronavirus, what worries you the most?” The interviewers would listen to the  
236 respondent for mentions of any of the pre-defined options and pick all that were  
237 mentioned. The pre-defined options included: “Hunger”; “Travel restrictions”; “I stopped  
238 working”; “I am not working well”; “Afraid of being infected myself”; “Afraid that some  
239 family member may be infected”; “Coronavirus does not have cure”; “I am afraid to lose  
240 my job”; “I have lost my job”; “Interruptions of classes”; and others. Further, the survey  
241 asked whether there had been any social event that was postponed in the household due  
242 to Coronavirus

243

## 244 **2.5. Concepts and methods of data analysis**

245 The key COVID-19 preventive measures were defined according to the Manual for the  
246 Prevention of COVID-19 published by the Ministry of Health of Mozambique in April 2020  
247 (13) and other standard definitions (14). Thus the wearing of face masks was defined as  
248 wearing a medical or non-medical mask by a person aged 6 years or more while indoor or  
249 outdoor settings where physical distancing of 1.5 meter minimum could not be maintained  
250 (15). Social distancing is keeping a minimum distance of 1.5 meter between people.  
251 Quarantine was defined as keeping someone who had a close contact with someone who  
252 has COVID-19 or is arriving from a place of risk of COVID-19, away from others for 14 days,

253 including in their own home (16). Confinement or staying at home was defined as making  
254 all the efforts to stay at home and avoid travelling, leaving home only for cases of strong  
255 motives (13). Frequent hand washing was defined as washing hands with water and soap  
256 or disinfecting with alcohol every time that a person has contact with objects or other items  
257 that have or may have been touched by somebody else (13).

258 The analysis presents descriptive statistics on perceptions and levels of compliance  
259 with COVID-19 preventive measures at individual and at household levels, comparing the  
260 two districts and comparing by other characteristics such as rural/urban place of residence,  
261 occupation, age, and level of education. T-test was performed to assess the statistical  
262 significance of the differences on proportions observed between Manhiça and Quelimane  
263 or between categories of respondents in the same district. The open-ended responses and  
264 the texts written to specify the “other” category were analysed using content analysis  
265 (resorting to Stata *regexm* function, which performs a match of a word or expression in a  
266 text, to arrange them in groups according to the main content of each text), to see if they  
267 could fit in any of the pre-defined responses or new categories needed to be created.  
268 Vague responses that could not permit assessing the accuracy of respondent’s knowledge  
269 and could not fit in any of the created categories were classified as “incomprehensive or  
270 vague answer”. The analyses were done using Stata 14.2 (17).

271

272

## 273 3. RESULTS

### 274 3.1. Socio-demographic profile of participants and their households

275 The study interviewed 770 individuals, of which 62.3% were heads of households, 18.6%,  
276 their spouses, 11.0% their sons or daughters, and 8.1% others. Table 1 shows that 64.2%  
277 of participants were living in urban areas, with a higher percentage of urban residents in  
278 Quelimane (88.9%) than in Manhiça (39.3%), which is consistent with the urban-rural  
279 differences between the two study sites, as described earlier. The majority (65.7%) of the  
280 respondents were females, also with large differences between the two districts – more  
281 females in Manhiça (76.0%) than in Quelimane (55.4%), which is in line with the sex  
282 composition of the population in the Southern and Central regions of the country (more  
283 female-headed households in the South than in the Center), (18). By education, 17.5% of  
284 participants were illiterate, and 43.4% had only primary education, and 39.1% had  
285 secondary or higher education. In relation to occupation, the majority (68.4%) were  
286 unemployed and were engaged on subsistence family activities such as farming, fishing,  
287 production of fire wood/charcoal, followed by public sector officers and students (12.5%),  
288 and vendors in formal and informal sectors (9.5%). With regards to access to drinking  
289 water, 48.2% of households had their sources of water within the household premises,  
290 either piped water or wells, but Manhiça (a district that has only a small town) had higher  
291 percentage of households using piped water (59.6%) than Quelimane (36.8%), a district  
292 that has a major city) – probably because in Manhiça there are many private water  
293 suppliers who pump underground water through electric pumps and distribute by pipe to  
294 their clients, while in Quelimane the fewer private suppliers that exist do it by buying water  
295 from government sources and sell it in trucks, from one neighbourhood to another (19).

296 Private suppliers may find it difficult to invest in water in Quelimane because the  
297 underground water is salty (19)  
298

299 Table 1. Socio-demographic characteristics of participants by study area.

| Variable                                             | Manhiça |      | Quelimane |      | Total |      |
|------------------------------------------------------|---------|------|-----------|------|-------|------|
|                                                      | n       | %    | n         | %    | N     | %    |
| <b>Total of participants</b>                         | 384     | 49.9 | 386       | 50.1 | 770   | 100  |
| <b>Relation to household head</b>                    |         |      |           |      |       |      |
| Head or spouse of head                               | 307     | 79.9 | 316       | 81.9 | 623   | 80.9 |
| Son or daughter                                      | 35      | 9.1  | 50        | 12.9 | 85    | 11.0 |
| Other                                                | 42      | 10.9 | 20        | 5.2  | 62    | 8.1  |
| <b>Sex of participant</b>                            |         |      |           |      |       |      |
| Male                                                 | 92      | 24.0 | 172       | 44.6 | 264   | 34.3 |
| Female                                               | 292     | 76.5 | 214       | 55.4 | 506   | 65.7 |
| <b>Area of residence</b>                             |         |      |           |      |       |      |
| Urban                                                | 151     | 39.3 | 343       | 88.9 | 494   | 64.2 |
| Rural                                                | 233     | 60.7 | 43        | 11.1 | 276   | 35.8 |
| <b>Age group in years</b>                            |         |      |           |      |       |      |
| Adolescent (<19)                                     | 15      | 3.9  | 22        | 5.7  | 37    | 4.8  |
| Adult (20 – 64)                                      | 317     | 82.6 | 345       | 89.4 | 662   | 86.0 |
| Elder (65+)                                          | 52      | 13.5 | 19        | 4.9  | 71    | 9.2  |
| <b>Level of education</b>                            |         |      |           |      |       |      |
| None                                                 | 93      | 24.2 | 42        | 10.9 | 135   | 17.5 |
| Primary                                              | 196     | 51.0 | 138       | 35.8 | 334   | 43.4 |
| Secondary or higher                                  | 95      | 24.7 | 206       | 53.4 | 301   | 39.1 |
| <b>Religion</b>                                      |         |      |           |      |       |      |
| Protestant/Evangelic                                 | 203     | 52.9 | 43        | 11.1 | 246   | 32.0 |
| Catholic                                             | 31      | 8.1  | 218       | 56.5 | 249   | 32.6 |
| Zion/other/none                                      | 144     | 37.5 | 30        | 7.8  | 174   | 22.6 |
| Islamic/Hindu                                        | 6       | 1.6  | 95        | 24.6 | 101   | 13.6 |
| <b>Main occupation</b>                               |         |      |           |      |       |      |
| Peasants/fisher/charcoal/dn'twork                    | 285     | 74.5 | 242       | 62.7 | 527   | 68.4 |
| Teachers/public officers/studen                      | 24      | 6.3  | 72        | 18.7 | 96    | 12.5 |
| Vendors formal/informal                              | 25      | 6.5  | 48        | 12.4 | 73    | 9.5  |
| Carpenters/welding/builders                          | 50      | 13.0 | 24        | 6.2  | 74    | 9.6  |
| <b>Is your main source of water at home/yard</b>     |         |      |           |      |       |      |
| Yes                                                  | 229     | 59.6 | 142       | 36.8 | 371   | 48.2 |
| No                                                   | 136     | 35.4 | 238       | 61.7 | 374   | 48.6 |
| Missing                                              | 19      | 5.0  | 6         | 1.6  | 25    | 3.3  |
| <b>Main source of water, independent of location</b> |         |      |           |      |       |      |
| Piped water                                          | 263     | 68.4 | 202       | 52.6 | 465   | 60.4 |
| Protected well                                       | 19      | 5.0  | 48        | 12.5 | 67    | 8.7  |
| Unprotected well                                     | 30      | 7.9  | 84        | 21.8 | 114   | 14.9 |
| Protected hole with pump                             | 56      | 14.6 | 3         | 0.8  | 59    | 7.7  |
| River, lake, rain, or other                          | 9       | 2.3  | 37        | 9.7  | 46    | 6.0  |
| Missing                                              | 7       | 1.8  | 11        | 2.8  | 18    | 2.3  |

300 Source: Household survey, Manhiça 2020 and Quelimane, 2021.

301

### 302           **3.2. Awareness about COVID-19 disease and its transmission dynamics**

303   Table 2 presents the data on the awareness of COVID-19 disease by key socio-demographic  
304   characteristics of participants, and it shows that 98.7% of participants had heard of  
305   Coronavirus, but this percentage dropped to 89.2% when asked about COVID-19, which  
306   suggests that this disease was better known as Coronavirus than COVID-19 in October 2020  
307   in Manhiça, and in February 2021 in Quelimane. The name COVID-19 was less known in  
308   Quelimane (86.0%) than in Manhiça (92.5%) (T-test  $p$ -value = 0.014 when comparing the  
309   two proportions), and in urban areas (97.9%) than in rural areas (100%), although this rural-  
310   urban difference does not appear to be significant ( $p=0.059$ ). Responses by religion  
311   appears to not differ between the two districts ( $p=0.659$ ), but they do by occupation –  
312   public sector officers and students appear to be better informed than vendors and  
313   peasants/fisherman unemployed/retired ( $p=0.005$ ). This is consistent with the expected,  
314   as one would expect public sector officers to be better informed about Coronavirus than  
315   peasants and fishermen, as they tend to have more access to the media and other means  
316   of public communication. In both Manhiça and Quelimane, the awareness about  
317   Coronavirus disease decreased with age and increased with level of education, and  
318   although this variation was not statistically significant in both Manhica ( $p=0.826$ ) and  
319   Quelimane ( $p=0.963$ ) it appears to be an expected pattern. More than a third (34.3%) of  
320   those who said they had heard of Coronavirus or COVID-19 said they were unable to define  
321   Coronavirus, 18.7% said that it was a disease caused by a virus, 14.8% said it was a  
322   respiratory disease, 10.0%, a disease that causes cough; 9.0%, dangerous, deadly incurable  
323   disease; and 4.6% a disease that comes from China.

324

325

326 Table 2. Awareness about COVID-19 disease by socio-demographic characteristics of  
327 participants, Manhiça and Quelimane.

| Variable                                                                                         | Manhiça |                   | Quelimane |       | Total |       | Chi2<br>P-value <sup>1</sup> |
|--------------------------------------------------------------------------------------------------|---------|-------------------|-----------|-------|-------|-------|------------------------------|
|                                                                                                  | n       | %                 | n         | %     | N     | %     |                              |
| <b>Total of participants</b>                                                                     | 384     | 49.9              | 386       | 50.1  | 770   | 100   |                              |
| <i>PANEL "A"</i>                                                                                 |         |                   |           |       |       |       |                              |
| <b>Have you ever heard of Coronavirus</b>                                                        |         |                   |           |       |       |       |                              |
| Yes                                                                                              | 379     | 98.7              | 381       | 98.7  | 760   | 98.7  | 0.788                        |
| No                                                                                               | 3       | 0.8               | 4         | 1.0   | 7     | 0.9   |                              |
| Missing                                                                                          | 2       | 0.5               | 1         | 0.3   | 3     | 0.4   |                              |
| <b>Have you ever heard of COVID-19</b>                                                           |         |                   |           |       |       |       |                              |
| Yes                                                                                              | 355     | 92.5              | 332       | 86.0  | 687   | 89.2  | 0.014                        |
| No                                                                                               | 28      | 7.3               | 53        | 13.7  | 81    | 10.5  |                              |
| Missing                                                                                          | 1       | 0.3               | 1         | 0.3   | 2     | 0.3   |                              |
| <i>PANEL "B"</i>                                                                                 |         |                   |           |       |       |       |                              |
| <b>Awareness of Coronavirus by selected characteristics: % of those who said YES<sup>2</sup></b> |         |                   |           |       |       |       |                              |
| <b>Place of residence</b>                                                                        |         |                   |           |       |       |       |                              |
| Urban                                                                                            | 146     | 96.7 <sup>3</sup> | 338       | 98.5  | 494   | 97.9  | 0.059                        |
| Rural                                                                                            | 233     | 100.0             | 43        | 100.0 | 276   | 100.0 |                              |
| <b>Age group in years</b>                                                                        |         |                   |           |       |       |       |                              |
| Adolescent (<20)                                                                                 | 15      | 100.0             | 22        | 100.0 | 37    | 100.0 | 0.906                        |
| Adult (20 – 64)                                                                                  | 313     | 98.7              | 340       | 98.6  | 653   | 98.6  |                              |
| Elder (65+)                                                                                      | 51      | 98.1              | 19        | 100.0 | 70    | 98.6  |                              |
| <b>Level of education</b>                                                                        |         |                   |           |       |       |       |                              |
| None                                                                                             | 91      | 97.9              | 41        | 97.6  | 132   | 97.8  | 0.106                        |
| Primary                                                                                          | 193     | 98.5              | 135       | 97.8  | 328   | 98.2  |                              |
| Secondary and more                                                                               | 95      | 100.0             | 205       | 99.5  | 300   | 99.6  |                              |
| <b>Religion</b>                                                                                  |         |                   |           |       |       |       |                              |
| Catholic                                                                                         | 31      | 100.0             | 215       | 98.6  | 246   | 98.8  | 0.659                        |
| Protestant/Evangelic                                                                             | 201     | 99.0              | 43        | 100.0 | 244   | 99.2  |                              |
| Zion/none/others/none                                                                            | 141     | 97.9              | 29        | 96.7  | 170   | 97.7  |                              |
| Islamic/Hindu                                                                                    | 6       | 100.0             | 94        | 99.0  | 100   | 99.0  |                              |
| <b>Main occupation</b>                                                                           |         |                   |           |       |       |       |                              |
| Peasants/fisher/unemployed                                                                       | 282     | 99.0              | 241       | 99.6  | 523   | 99.2  | 0.005                        |
| Vendors formal/informal                                                                          | 24      | 96.0              | 45        | 93.8  | 69    | 94.5  |                              |
| Carpenters/welding/builders                                                                      | 49      | 98.0              | 23        | 95.8  | 72    | 97.3  |                              |
| Public sector officers/ students                                                                 | 24      | 100.0             | 72        | 100.0 | 96    | 100.0 |                              |

328 Source: Household survey, Manhiça 2020 and Quelimane, 2021.

<sup>1</sup> The P-value in Panel "A" and "B" refers to Pearson X<sup>2</sup> test of how significant are the differences of responses between Manhiça and Quelimane.

<sup>2</sup> The focus on those who said YES do Coronavirus is because only 3 people said YES to both Coronavirus and Covid-19, so there is no need to repeat the tabulations for only 3 respondents.

<sup>3</sup> Chi<sup>2</sup> P-value in Manhiça is = 0.009.



329 Table 3 presents the results on the knowledge of symptoms, means of transmission and  
330 prevention of Coronavirus, and it shows that dry cough (17.8%), fever (15.7%), flu-like  
331 symptoms (14.2%), breathing difficulties (13.6%), and pain in the throat (8.8%) were the  
332 symptoms most mentioned by the respondents. By district, significant differences were  
333 observed in relation to the proportion of respondents who mentioned fever ( $p=0.003$ ), flu-  
334 like symptoms ( $p=0.000$ ), pain in the throat ( $p=0.002$ ), and those who said did not know  
335 ( $p=0.000$ ). The mechanisms of transmission most mentioned are touching infected person  
336 or object (30.9%), inhaling the air from the mouth of an infected person (21.3%), contact  
337 with saliva droplets from an infected person (20.4%), and touching the mouth, nose or eyes  
338 (13.3%). The means of prevention most mentioned were washing hands with soap or  
339 alcohol (30.9%), using face mask always (28.6%), social distancing (16.6%), and avoiding  
340 crowded places (10.2%). By district significant differences were observed in relation to  
341 avoiding crowded places ( $p=0.000$ ) and avoiding travelling ( $p=0.000$ ).

342

343

344

345

346

347

348

349

350

351

352

353 Table 3: Knowledge of symptoms, means of transmission and prevention of Coronavirus

| Variable                                                                                       | Manhiça |                | Quelimane |                | Total |                | Chi2    |
|------------------------------------------------------------------------------------------------|---------|----------------|-----------|----------------|-------|----------------|---------|
|                                                                                                | n       | % <sup>4</sup> | n         | % <sup>7</sup> | N     | % <sup>5</sup> | P-value |
| <b>What are the symptoms of Coronavirus? (multiple options) [If have heard of Coronavirus]</b> |         |                |           |                |       |                |         |
| Dry cough                                                                                      | 184     | 47.9           | 201       | 52.1           | 385   | 17.8           | 0.249   |
| Fever                                                                                          | 149     | 38.8           | 191       | 49.5           | 340   | 15.7           | 0.003   |
| Flu-like symptoms                                                                              | 183     | 47.7           | 124       | 32.1           | 307   | 14.2           | 0.000   |
| Breathing difficulties                                                                         | 142     | 37.0           | 153       | 39.6           | 295   | 13.6           | 0.448   |
| Head ache                                                                                      | 124     | 32.3           | 159       | 41.2           | 283   | 13.1           | 0.010   |
| Pain in the throat                                                                             | 113     | 29.4           | 76        | 19.7           | 189   | 8.7            | 0.002   |
| Cough with sputum                                                                              | 58      | 15.1           | 68        | 17.6           | 126   | 5.8            | 0.346   |
| Muscular pain                                                                                  | 61      | 15.9           | 60        | 15.7           | 121   | 5.6            | 0.896   |
| Don't know                                                                                     | 12      | 3.1            | 43        | 11.1           | 55    | 2.5            | 0.000   |
| Vomiting                                                                                       | 20      | 5.2            | 30        | 7.8            | 50    | 2.3            | 0.149   |
| Other                                                                                          | 7       | 1.8            | 7         | 1.8            | 14    | 0.6            | 0.992   |
| Total multiple responses                                                                       | 1,053   | -              | 1,112     | -              | 2,165 | 100            | -       |
| <b>How is Coronavirus transmitted? (multiple options)</b>                                      |         |                |           |                |       |                |         |
| Touch infected person/object <sup>6</sup>                                                      | 240     | 62.5           | 248       | 64.3           | 488   | 30.9           | 0.615   |
| Inhale air mouth of infected                                                                   | 186     | 48.4           | 150       | 38.9           | 336   | 21.3           | 0.007   |
| Droplets of saliva of infected                                                                 | 169     | 44.0           | 153       | 39.6           | 322   | 20.4           | 0.219   |
| Touch mouth or nose, eyes                                                                      | 106     | 27.6           | 104       | 26.9           | 210   | 13.3           | 0.837   |
| Kiss infected person                                                                           | 100     | 26.0           | 61        | 15.8           | 161   | 10.2           | 0.000   |
| Other transmission means                                                                       | 16      | 4.2            | 44        | 11.4           | 60    | 3.8            | 0.000   |
| Do not know                                                                                    | 0       | 0.0            | 2         | 0.5            | 2     | 0.1            | 0.158   |
| Total of multiple responses                                                                    | 817     | -              | 762       | -              | 1,500 | 100.0          | -       |
| <b>How can we prevent Coronavirus? (multiple options)</b>                                      |         |                |           |                |       |                |         |
| Wash hand/soap or alcohol                                                                      | 298     | 77.6           | 318       | 82.4           | 616   | 30.9           | 0.097   |
| Use face mask always                                                                           | 275     | 71.6           | 296       | 76.7           | 571   | 28.6           | 0.108   |
| Social distancing                                                                              | 155     | 40.4           | 177       | 45.9           | 332   | 16.6           | 0.124   |
| Avoid crowded places                                                                           | 124     | 32.4           | 80        | 20.7           | 204   | 10.2           | 0.000   |
| Avoid touch mouth/noise/eye                                                                    | 57      | 14.8           | 53        | 13.7           | 110   | 5.5            | 0.659   |
| Other means                                                                                    | 21      | 5.5            | 42        | 10.9           | 63    | 3.2            | 0.006   |
| Quarantine                                                                                     | 31      | 8.1            | 23        | 6.0            | 54    | 2.7            | 0.251   |
| Avoid travelling                                                                               | 42      | 10.9           | 3         | 0.8            | 45    | 2.3            | 0.000   |
| Total multiple responses                                                                       | 1,003   | -              | 992       | -              | 1,995 | 100.0          | -       |

354 Source: Household survey, Manhiça 2020 and Quelimane, 2021.

355

<sup>4</sup> % of respondents that mentioned a symptom – tells how many respondents mentioned a symptom

<sup>5</sup> % of times that a symptom was mentioned – tells which symptom was most mentioned.

<sup>6</sup> Including hugging infected person

### 356           **3.3. Knowledge and perceptions of COVID-19 preventive measures**

357    Table 4 presents the results on how people understand the COVID-19 preventive measures.  
358    The majority of respondents knew that social distancing refers to keeping some distance  
359    between each other (62.0%) [62.0% comes from summing “keeping 1.5-2 meters from others”  
360    (43.9%) and “to be away/be distant from others” (18.1%)], but 19.9% gave incomprehensive or  
361    vague answers, and 17.5% said that they did not know. In relation to hand washing in the  
362    context of COVID-19, 32.9% of respondents gave vague responses, 28.6% said that they  
363    wash their hands when leaving or arriving at home; 26.0%, after touching something or  
364    someone; and 7.7%, after using the toilet or when the hands are dirty or when they are  
365    about to eat something. Quarantine was defined as staying at home or in the same place  
366    by 36.6% of respondents; 26.5% defined it comprehensively as isolating someone who is  
367    sick or suspected or who had contact with positive or suspected cases (some respondents  
368    in this group indicated the period of 14 days); but 29.2% said that they did not know what  
369    is was.

370

371

372

373

374

375

376

377 Table 4. Knowledge and perceptions of the recommend anti-COVID-19 measures

| Variable                                                                       | Manhiça |      | Quelimane |      | Total |      | Chi2    |
|--------------------------------------------------------------------------------|---------|------|-----------|------|-------|------|---------|
|                                                                                | n       | %    | n         | %    | N     | %    | P-value |
| <b>Total of participants</b>                                                   | 384     | 49.9 | 386       | 50.1 | 770   | 100  |         |
| <b>What social distancing means?</b>                                           |         |      |           |      |       |      |         |
| To keep 1,5-2m from others                                                     | 170     | 44.3 | 168       | 43.5 | 338   | 43.9 | 0.000   |
| To be away/distant from other                                                  | 37      | 9.6  | 102       | 26.4 | 139   | 18.1 |         |
| Inconclusive/astray answer                                                     | 93      | 24.2 | 60        | 15.5 | 153   | 19.9 |         |
| Don't know                                                                     | 79      | 20.6 | 56        | 14.5 | 135   | 17.5 |         |
| Missing                                                                        | 5       | 1.3  | 0         | 0.0  | 5     | 0.6  |         |
| <b>In which situations do you wash your hands, in this context of COVID-19</b> |         |      |           |      |       |      |         |
| Inconclusive/astray answer                                                     | 173     | 45.1 | 80        | 20.7 | 253   | 32.9 | 0.000   |
| When leaving/returning home                                                    | 47      | 12.2 | 173       | 44.8 | 220   | 28.6 |         |
| After touching something/one                                                   | 116     | 30.2 | 84        | 21.8 | 200   | 26.0 |         |
| After toilet/before meals/dirty                                                | 14      | 3.6  | 45        | 11.7 | 59    | 7.7  |         |
| Don't know                                                                     | 24      | 6.3  | 3         | 0.8  | 27    | 3.5  |         |
| Missing                                                                        | 10      | 2.6  | 1         | 0.3  | 11    | 1.4  |         |
| <b>What it means to avoid crowded places?</b>                                  |         |      |           |      |       |      |         |
| Inconclusive/astray answer                                                     | 113     | 29.4 | 95        | 24.6 | 208   | 27.0 | 0.000   |
| Not more than 5-10 people                                                      | 90      | 23.4 | 103       | 26.7 | 193   | 25.1 |         |
| Many people                                                                    | 30      | 7.8  | 109       | 28.2 | 139   | 18.1 |         |
| Not more than 20 people                                                        | 57      | 14.8 | 23        | 6.0  | 80    | 10.4 |         |
| Don't know                                                                     | 31      | 8.1  | 42        | 10.9 | 73    | 9.5  |         |
| Not more than 50 people                                                        | 43      | 11.2 | 7         | 1.8  | 50    | 6.5  |         |
| Missing                                                                        | 20      | 5.2  | 7         | 1.8  | 27    | 3.5  |         |
| <b>What it means to avoid travelling?</b>                                      |         |      |           |      |       |      |         |
| Inconclusive/astray answer                                                     | 208     | 54.2 | 291       | 75.4 | 499   | 64.8 | 0.000   |
| Don't know                                                                     | 67      | 17.4 | 59        | 15.3 | 126   | 16.4 |         |
| To stay at home                                                                | 58      | 15.1 | 25        | 6.5  | 83    | 10.8 |         |
| To travel only for extreme case                                                | 42      | 10.9 | 2         | 0.5  | 44    | 5.7  |         |
| Missing                                                                        | 9       | 2.3  | 9         | 2.3  | 18    | 2.3  |         |
| <b>What it means quarantine?</b>                                               |         |      |           |      |       |      |         |
| To stay at home or same place                                                  | 121     | 31.5 | 161       | 41.7 | 282   | 36.6 | 0.000   |
| Don't know                                                                     | 112     | 29.2 | 113       | 29.3 | 225   | 29.2 |         |
| To isolate sick/suspect person                                                 | 127     | 33.1 | 77        | 19.9 | 204   | 26.5 |         |
| Inconclusive/astray answer                                                     | 14      | 3.6  | 25        | 6.5  | 39    | 5.1  |         |
| Missing                                                                        | 4       | 1.0  | 10        | 2.6  | 14    | 1.8  |         |
| <b>What it means to avoid touching the mouth, or eyes, or nose</b>             |         |      |           |      |       |      |         |
| Inconclusive/astray answer                                                     | 112     | 29.2 | 210       | 54.4 | 322   | 41.8 | 0.000   |
| Wash hands before touch them                                                   | 147     | 38.3 | 60        | 15.5 | 207   | 26.9 |         |
| Don't know                                                                     | 72      | 18.8 | 83        | 21.5 | 155   | 20.1 |         |
| Missing                                                                        | 53      | 13.8 | 33        | 8.5  | 86    | 11.2 |         |

378 Source: Household survey, Manhiça 2020 and Quelimane, 2021.

### 380 3.4. Implementation of anti-COVID-19 measures at individual level

381 Table 5 presents the results of participants' self-assessment of their level of compliance  
 382 with anti-COVID-19 measures. It shows that 35.8% of the respondents said that they could  
 383 not stay at home at all, and only 20.0% could stay at home 100% of the time. Only 21.9%  
 384 of respondents said that they could wash their hands on all occasions thought to be  
 385 necessary. Mask wearing in public places appears to be the measure that more people  
 386 (48.8%) think they complied with it in 100% of the occasions, followed by avoiding  
 387 unnecessary travels (40.0%), avoiding crowded places (34.0%), and social distancing outside  
 388 the household (34.4%). On the other hand, the most difficult anti-COVID-19 measure  
 389 appears to be avoiding touching the mouth or nose or eyes (with 77.4% of respondents  
 390 saying that they did not comply with it or complied only in 25% or 50% of the occasions  
 391 (77.4% is the sum of 28.7%, 25.1% and 23.6%). This is followed by social distancing within  
 392 the household (73.1%), staying at home (66.2%) and frequent hand washing (56.0%).

393  
 394 Table 5. Self-assessment of compliance with anti-COVID-19 measures at individual level

| Variable                                                            | Manhiça |      | Quelimane |      | Total |      | Chi2<br>P-value |
|---------------------------------------------------------------------|---------|------|-----------|------|-------|------|-----------------|
|                                                                     | n       | %    | n         | %    | N     | %    |                 |
| <b>Total of participants</b>                                        | 384     | 49.9 | 386       | 50.1 | 770   | 100  |                 |
| <b>Degree of compliance with staying at home</b>                    |         |      |           |      |       |      |                 |
| 0%                                                                  | 153     | 39.8 | 123       | 31.9 | 276   | 35.8 | 0.000           |
| 100%                                                                | 98      | 25.5 | 56        | 14.5 | 154   | 20.0 |                 |
| 25%                                                                 | 57      | 14.8 | 63        | 16.3 | 120   | 15.6 |                 |
| 50%                                                                 | 44      | 11.5 | 70        | 18.1 | 114   | 14.8 |                 |
| 75%                                                                 | 23      | 6.0  | 74        | 19.2 | 97    | 12.6 |                 |
| <b>Degree of compliance with hand-washing always</b>                |         |      |           |      |       |      |                 |
| 50%                                                                 | 132     | 34.4 | 94        | 24.4 | 226   | 29.4 | 0.000           |
| 25%                                                                 | 53      | 13.8 | 119       | 30.8 | 172   | 22.3 |                 |
| 100%                                                                | 107     | 27.9 | 62        | 16.1 | 169   | 21.9 |                 |
| 75%                                                                 | 87      | 22.7 | 80        | 20.7 | 167   | 21.7 |                 |
| 0%                                                                  | 2       | 0.5  | 31        | 8.0  | 33    | 4.3  |                 |
| <b>Degree of compliance with face mask wearing in public places</b> |         |      |           |      |       |      |                 |
| 100%                                                                | 192     | 50.0 | 184       | 47.7 | 376   | 48.8 | 0.000           |
| 50%                                                                 | 85      | 22.1 | 87        | 22.5 | 172   | 22.3 |                 |

|                                                                              |     |      |     |      |     |      |       |
|------------------------------------------------------------------------------|-----|------|-----|------|-----|------|-------|
| 75%                                                                          | 70  | 18.2 | 71  | 18.4 | 141 | 18.3 |       |
| 25%                                                                          | 32  | 8.3  | 39  | 10.1 | 71  | 9.2  |       |
| 0%                                                                           | 3   | 0.8  | 5   | 1.3  | 8   | 1.0  |       |
| <b>Degree of compliance with avoiding touching the mouth, nose, and eyes</b> |     |      |     |      |     |      |       |
| 0%                                                                           | 18  | 4.7  | 203 | 52.6 | 221 | 28.7 |       |
| 25%                                                                          | 131 | 34.1 | 62  | 16.1 | 193 | 25.1 |       |
| 50%                                                                          | 129 | 33.6 | 53  | 13.7 | 182 | 23.6 | 0.000 |
| 75%                                                                          | 52  | 13.5 | 60  | 15.5 | 112 | 14.5 |       |
| 100%                                                                         | 52  | 13.5 | 7   | 1.8  | 59  | 7.7  |       |
| <b>Degree of compliance with social distancing within the household</b>      |     |      |     |      |     |      |       |
| 0%                                                                           | 18  | 4.7  | 192 | 49.7 | 210 | 27.3 |       |
| 25%                                                                          | 131 | 34.1 | 51  | 13.2 | 182 | 23.6 |       |
| 50%                                                                          | 129 | 33.6 | 42  | 10.9 | 171 | 22.2 | 0.000 |
| 75%                                                                          | 52  | 13.5 | 50  | 13.0 | 102 | 13.2 |       |
| 100%                                                                         | 52  | 13.5 | 7   | 1.8  | 59  | 7.7  |       |
| <b>Degree of compliance with social distancing outside the household</b>     |     |      |     |      |     |      |       |
| 75%                                                                          | 111 | 28.9 | 154 | 39.9 | 265 | 34.4 |       |
| 100%                                                                         | 138 | 35.9 | 85  | 22.0 | 223 | 29.0 |       |
| 50%                                                                          | 94  | 24.5 | 93  | 24.1 | 187 | 24.3 | 0.000 |
| 25%                                                                          | 31  | 8.1  | 37  | 9.6  | 68  | 8.8  |       |
| 0%                                                                           | 8   | 2.1  | 17  | 4.4  | 25  | 3.2  |       |
| <b>Degree of compliance with avoiding crowded places</b>                     |     |      |     |      |     |      |       |
| 100%                                                                         | 157 | 40.9 | 105 | 27.2 | 262 | 34.0 |       |
| 75%                                                                          | 96  | 25.0 | 128 | 33.2 | 224 | 29.1 |       |
| 50%                                                                          | 94  | 24.5 | 99  | 25.6 | 193 | 25.1 | 0.000 |
| 25%                                                                          | 30  | 7.8  | 33  | 8.5  | 63  | 8.2  |       |
| 0%                                                                           | 5   | 1.3  | 21  | 5.4  | 26  | 3.4  |       |
| <b>Degree of compliance with avoiding unnecessary travels</b>                |     |      |     |      |     |      |       |
| 100%                                                                         | 208 | 54.2 | 100 | 25.9 | 308 | 40.0 |       |
| 50%                                                                          | 68  | 17.7 | 99  | 25.6 | 167 | 21.7 |       |
| 75%                                                                          | 79  | 20.6 | 62  | 16.1 | 141 | 18.3 | 0.000 |
| 25%                                                                          | 19  | 4.9  | 95  | 24.6 | 114 | 14.8 |       |
| 0%                                                                           | 8   | 2.1  | 30  | 7.8  | 38  | 4.9  |       |

395 Source: Household survey, Manhiça 2020 and Quelimane, 2021.

396

### 397 **3.5. Implementation of anti-COVID-19 measures at household level**

398 Table 6 presents the degree of compliance with anti-COVID-19 measures at household  
 399 level, combining data from questions and observations as described in the section on  
 400 methods. It shows that sixty-nine per cent (69.4%) of households did not have hand  
 401 washing facilities or disinfection (75.6% in Quelimane and 63.0% in Manhiça); and of those  
 402 that did have devices, 58.5% had no water in the hand washing facility, 62.0% had no soap,

403 and 74.4% had no ash in these devices. In addition to hand washing facilities, it was asked  
 404 whether there was any other disinfectant or not – 22.6% had at least one other disinfectant  
 405 such as alcohol or alcohol gel. The other indicator was the existence and the number of  
 406 masks in the household - almost all households (98.1%) had masks, but the ratio of masks  
 407 per household member was very low (median of 1 mask per member aged 6+ years), which  
 408 suggests that people were using the same mask for too long time without replacing it every  
 409 few hours as recommended by the Ministry of Health of Mozambique (13).

410 Table 6. Implementation of anti-COVID-19 measures at household level, Manhiça and  
 411 Quelimane

| Variable                                                             | Manhiça    |              | Quelimane |              | Total      |              | Chi2<br>P-value |
|----------------------------------------------------------------------|------------|--------------|-----------|--------------|------------|--------------|-----------------|
|                                                                      | n          | %            | n         | %            | N          | %            |                 |
| <b>Total of households</b>                                           | 384        | 49.9         | 386       | 50.1         | 770        | 100          |                 |
| <b>Is there a hand washing facility in the household?</b>            |            |              |           |              |            |              |                 |
| Yes                                                                  | 141        | 36.7         | 93        | 24.1         | 234        | 30.4         | 0.001           |
| No                                                                   | 242        | 63.0         | 292       | 75.6         | 534        | 69.4         |                 |
| Missing                                                              | 1          | 0.3          | 1         | 0.3          | 2          | 0.3          |                 |
| <b>Total households with washing</b>                                 | <b>141</b> | <b>100.0</b> | <b>93</b> | <b>100.0</b> | <b>234</b> | <b>100.0</b> |                 |
| <b>Is there water in the hand washing facility?</b>                  |            |              |           |              |            |              |                 |
| Yes                                                                  | 44         | 31.2         | 52        | 55.9         | 96         | 41.0         | 0.001           |
| No                                                                   | 96         | 68.1         | 41        | 44.1         | 137        | 58.5         |                 |
| Missing                                                              | 1          | 0.7          | 0         | 0.0          | 1          | 0.4          |                 |
| <b>Is there soap in the hand washing facility?</b>                   |            |              |           |              |            |              |                 |
| Yes                                                                  | 44         | 31.2         | 44        | 47.3         | 88         | 37.6         | 0.018           |
| No                                                                   | 97         | 68.8         | 48        | 51.6         | 145        | 62.0         |                 |
| Missing                                                              | 0          | 0.0          | 1         | 1.1          | 1          | 0.4          |                 |
| <b>Is there ash in the hand washing facility?</b>                    |            |              |           |              |            |              |                 |
| Yes                                                                  | 19         | 13.5         | 34        | 36.6         | 53         | 22.6         | 0.000           |
| No                                                                   | 116        | 82.3         | 58        | 62.4         | 174        | 74.4         |                 |
| Missing                                                              | 6          | 4.3          | 1         | 1.1          | 7          | 3.0          |                 |
| <b>Is there any other disinfectant in the hand washing facility?</b> |            |              |           |              |            |              |                 |
| Yes                                                                  | 19         | 13.5         | 34        | 36.6         | 53         | 22.6         | 0.000           |
| No                                                                   | 93         | 66.0         | 58        | 62.4         | 151        | 64.5         |                 |
| Missing                                                              | 29         | 20.6         | 1         | 1.1          | 30         | 12.8         |                 |
| <b>Face masks in the household</b>                                   |            |              |           |              |            |              |                 |
| Median of masks p/ household                                         | 4          |              | 5         |              | 5          |              |                 |
| Household without face masks                                         | 5          |              | 10        |              | 15         |              |                 |
| Ratio of face mask/person 6+y                                        | 1.1        |              | 0.9       |              | 0.9        |              |                 |

412 Source: Household survey, Manhiça 2020 and Quelimane, 2021.

### 413        **3.6.    Prevalence of symptoms of respiratory illness**

414    The results on symptoms of respiratory illness show that 93 (12.1%) respondents have had  
415    symptoms sometime since COVID-19 was announced first in South Africa (05 March 2020),  
416    and 38.1% of them had symptoms in two or more episodes. However, only 6 households  
417    (0.8%) had a person with symptoms at the date of interview, of which 4 had only one  
418    person and 2 had two people with symptoms. By district, Quelimane had significantly  
419    higher number of (past and current) cases with symptoms 80 (20.7% of respondents) than  
420    Manhiça 13 (3.4%), ( $p=0.000$ ).

### 421        **3.7.    Perceived hardships due to Coronavirus**

422    The results on the hardships felt by the population due to Coronavirus show that the  
423    closure of educational institutions was the leading hardship (with 18.3% of mentions),  
424    followed by hunger (17.5%), fear of being infected or having someone from the family  
425    infected (12.2%), and other worries (12.0%), (Table 7). The “other worries” included fear  
426    of death and of uncertainty of the future (32.1%), closure of churches (28.3%), and loss of  
427    opportunities for employment and other means of livelihood (18.3%). Most of these  
428    hardships were reported with significant differences by districts (see those with p-value <  
429    0.05).

430        In relation to postponement of social events due to Coronavirus, 25.3% of  
431    respondents said that they had postponed at least one social event in their household –  
432    31.8% of these households postponed more than one event. Wedding and alike  
433    ceremonies (23.5%), religious and traditional ceremonies (22.7%), birth date parties  
434    (13.4%), and gatherings for *xitique* (6.7%) are the leading postponed events. *Xitique* is a  
435    term in local language of Southern Mozambique (Changana), but also used equally in  
436    Quelimane, for a network or group of friends, family members, or colleagues for inter-



437 support or other means of solidarity involving money saving which is rotatively paid to one  
438 member of the group. Often it involves social gathering in the household of the member  
439 that is receiving the group's savings (20), (21).  
440

441

442 Table 7. Participants' worries caused by Coronavirus in Manhiça and Quelimane

| Variable                                                                                        | Manhiça |       | Quelimane |       | Total |       | Chi2<br>P-value |
|-------------------------------------------------------------------------------------------------|---------|-------|-----------|-------|-------|-------|-----------------|
|                                                                                                 | n       | %     | n         | %     | N     | %     |                 |
| <b>Total of participants</b>                                                                    | 384     | 49.9  | 386       | 50.1  | 770   | 100   |                 |
| <b>In this context of Coronavirus, what worries you the most? (multiple options)</b>            |         |       |           |       |       |       |                 |
| Closure of schools                                                                              | 200     | 59.9  | 134       | 40.1  | 334   | 18.3  | 0.000           |
| Hunger                                                                                          | 155     | 48.6  | 164       | 51.4  | 319   | 17.5  | 0.550           |
| Me or family member be infected                                                                 | 34      | 15.2  | 189       | 84.8  | 223   | 12.2  | 0.000           |
| Other worries                                                                                   | 96      | 43.8  | 123       | 56.2  | 219   | 12.0  | 0.035           |
| I am not working well                                                                           | 97      | 58.1  | 70        | 41.9  | 167   | 9.2   | 0.016           |
| Travel restrictions                                                                             | 110     | 67.1  | 54        | 32.9  | 164   | 9.0   | 0.000           |
| COVID-19 has no cure                                                                            | 96      | 68.1  | 45        | 31.9  | 141   | 7.7   | 0.000           |
| Increasing numbers in Moz. & out                                                                | 57      | 42.5  | 77        | 57.5  | 134   | 7.4   | 0.062           |
| I lost job or stopped working                                                                   | 39      | 45.4  | 47        | 54.7  | 86    | 4.7   | 0.374           |
| I am afraid of losing my job                                                                    | 31      | 88.6  | 4         | 11.4  | 35    | 1.9   | 0.000           |
| Total of times mentioned                                                                        | 915     | -     | 907       | -     | 1,822 | 100.0 | -               |
| <b>Other worries in the context of Coronavirus (if option not in the list above)</b>            |         |       |           |       |       |       |                 |
| Afraid death & uncertain future                                                                 | 14      | 19.7  | 54        | 80.3  | 71    | 32.4  | 0.000           |
| Closure of churches                                                                             | 41      | 66.1  | 21        | 33.9  | 62    | 28.3  | 0.000           |
| Loss of job & econ. opportunities                                                               | 26      | 65.0  | 14        | 35.0  | 40    | 18.3  | 0.003           |
| Others/Don't know                                                                               | 12      | 42.9  | 13        | 57.1  | 28    | 12.8  | 0.911           |
| Increase of prices                                                                              | 1       | 7.1   | 12        | 92.9  | 14    | 6.4   | 0.004           |
| Missing                                                                                         | 2       | 50.0  | 2         | 50.0  | 4     | 1.8   | 0.802           |
| Total                                                                                           | 96      | -     | 123       | -     | 219   | 100.0 | -               |
| <b>Was there any social events that was postponed in the household due to Coronavirus</b>       |         |       |           |       |       |       |                 |
| Yes                                                                                             | 76      | 19.8  | 119       | 30.8  | 195   | 25.3  | 0.000           |
| No                                                                                              | 300     | 78.1  | 267       | 68.2  | 567   | 73.6  |                 |
| Missing                                                                                         | 8       | 2.1   | 0         | 0.0   | 8     | 1.0   |                 |
| <b>Social events that were postponed in the household due to Coronavirus (multiple options)</b> |         |       |           |       |       |       |                 |
| Other events                                                                                    | 9       | 10.5  | 71        | 46.7  | 80    | 33.6  | 0.000           |
| Wedding and like ceremonies                                                                     | 16      | 18.6  | 40        | 26.3  | 56    | 23.5  |                 |
| Religious/traditional ceremony                                                                  | 39      | 45.3  | 15        | 9.9   | 54    | 22.7  |                 |
| Birth date party                                                                                | 14      | 16.3  | 18        | 11.8  | 32    | 13.4  |                 |
| Xitique (family/friends' gathering)                                                             | 8       | 9.3   | 8         | 5.3   | 16    | 6.7   |                 |
| Total                                                                                           | 86      | 100.0 | 152       | 100.0 | 238   | 100.0 |                 |

443

Source: Household survey, Manhiça 2020 and Quelimane, 2021.

444

445

#### 446        **4. DISCUSSION**

447        This study aimed to assess community perceptions and levels of compliance with anti-  
448        COVID-19 measures recommended by the government of Mozambique in the districts of  
449        Manhiça and Quelimane. At the time the study was designed and implemented, there were  
450        several challenges both from the conceptual and operational perspectives, as well as from  
451        the safety point of view, as both the researchers and the participants were afraid of  
452        exposure to a very contagious and deadly disease by conducting or participating in the  
453        study. From the perspectives of concepts and operational procedures, some concepts were  
454        new to the general public, and most importantly, some concepts were changing over the  
455        course of the pandemic, for example, the term “social distancing” has changed to “physical  
456        distancing”, and “crowded places” were venue- and time-variant and the maximum number  
457        of people allowed to gather together in one place changed continually as the disease was  
458        evolving. Also, the study required visiting hundreds of households (with more than 3,500  
459        people) to study a disease that had forced people to refrain from moving or visiting each  
460        other to avoid transmission. Even the IRB at CISM was puzzled on whether this study could  
461        be approved due to safety issues and the request made by the study team for using oral  
462        audio-recorded consents instead of the commonly used written consents. At that time,  
463        most studies were collecting data using information and communication technologies  
464        (ICTs)(22), but this was not recommended for Manhiça and Quelimane where the coverage  
465        of ICTs was very limited – which could lead to exclusion of participants without access to  
466        ICTs (23). For example, a study on COVID-19 preventive behaviour using ICTs in China,  
467        required that participants should have been previously registered in an online-based  
468        survey platform and be literate, which means that all those not registered in that platform

469 or who were illiterate were excluded; and it ended up with only 13% of participants from  
470 rural areas and 87% from urban areas (24).

471         Given the absence of previous studies on how community members understand and  
472 comply with anti-COVID-19 measures in Mozambique and other countries, designing the  
473 questionnaires was very challenging. Thus, the research team resorted to open-ended  
474 questions for the interviewers to write everything the respondent would say because there  
475 was no literature to guide the elaboration of pre-defined responses. However, too many  
476 open-ended questions (and too many “others, specify”) led to hard work during the  
477 analysis than would have been if the majority of questions were close-ended. This led to  
478 delay in the analysis and publication of the results, although it served also as a good  
479 opportunity to capture as much as possible variability of responses than would otherwise  
480 have been; and it improved the researchers’ ability to analysis lengthy text-responses in a  
481 quantitative survey.

482         The results show that most participants had heard of Coronavirus and COVID-19 by  
483 the time of the survey, with more people acknowledging Coronavirus than COVID-19, both  
484 in Manhiça and in Quelimane. At that time, there were too many new concepts around the  
485 pandemic and the terms Coronavirus and COVID-19 appeared to be used interchangeably  
486 to mean the same disease. Even the term “novel Coronavirus” was not as popular as the  
487 two, let alone the term SARS-CoV-2. Likewise, even some apparently obvious terms like  
488 confinement, stay at home, immobility, and quarantine had not been well communicated  
489 to the public in Mozambique. This leads to a recommendation that in public emergencies  
490 such as these, policy makers should be cautious to use the same terms consistently, and  
491 avoid similar but not equal terms, for example, it has never been very clear whether  
492 confinement, isolation, staying at home, and immobility meant the same or they were

493 different within the context of Coronavirus. Later on, a new term started to be publically  
494 used without a clear definition, e.g. “the new normal” – intended to advise the population  
495 to adapt to this new context for longer periods of time - but none knows how this was  
496 interpreted because sometimes it was used simultaneously with relaxation of anti-COVID-  
497 19 measures. Further, at the time this survey was conducted, some respondents in rural  
498 and urbans areas of Central Mozambique did not believe that COVID-19 existed, and others  
499 said that fighting for food was of high priority than following anti-COVID-19 measures  
500 (Chaimite, 2020); and in Maputo city, misinformation was considered an important issue  
501 for policy makers to deal with (PERC, 2020) - this study showed that 72% of respondents  
502 believed hot climate prevents COVID-19, 41% believed COVID-19 is a germ weapon created  
503 by a government; and 39% said they would like more information, particularly on COVID-  
504 19 protection, causes and cure (PERC, 2020).

505 This study shows highs percentages of vague or inconclusive responses (ranging from  
506 5.1% in the definition of quarantine, to 64.8% in the definition of avoiding travelling).  
507 Adding the “don’t knows” to these vague responses leads to the conclusion that most  
508 respondents did not understand very well the meaning of most of the anti-COVID-19  
509 measures. This weakness needs to be addressed not only from the perspective of the  
510 population, but also from how such measures were defined by the government. For  
511 example the measure of keeping distance from each other was disseminated as “social  
512 distancing” first, but later it changed to “physical distancing”, and the minimum distance  
513 was between 1 and 1.5 meters before 2 meters came out (but the 2 meters was seldom  
514 disseminated). These changes occurred also in regard to “crowded places”- it was defined  
515 depending on whether the people are in a closed or open space, which was used to define  
516 the maximum number of people that could gather (including for funeral), and these

517 numbers have been changing constantly. These unclear and/or constantly changing  
518 measures may have confused the population.

519 Compliance with anti-COVID-19 measures at individual and at household levels is  
520 low, both in Manhiça and in Quelimane – below 50% in most of the indicators used in this  
521 study – see percentage of “Yes” in table 7 and of those implementing a certain measure at  
522 100% in table 6. A similar result (55.5% of overall level of compliance) was found in a study  
523 on the compliance with COVID-19 preventive measures among food and drink  
524 establishments in Ethiopia, in 2020 (25). Our study found that even the apparently easiest  
525 measure (mask wearing in public places), most people (50.8%) confessed that they did not  
526 comply with it when they think they should. Only 40.0% of the respondents said that they  
527 were avoiding unnecessary travels in 100% of the times, 34.0% were avoiding crowded  
528 places, and 29.1% were doing social distancing outside the household. Structural and  
529 personal factors may have contributed to lower compliance as most people live on daily-  
530 income activities and even those with a monthly income had to go for work using crowded  
531 public transports. This indicates that these measures could have been followed better by  
532 the population if the government had invested on public transports system to reduce  
533 overcrowding in the bus-stops and within the public transport vehicles.

534 The prevalence of symptoms of respiratory illness in the households was very low,  
535 and most respondents did not know anyone with such symptoms in their communities.  
536 However, the meaning or usefulness of these findings must be taken cautiously because of  
537 the bias involved in self-report of symptoms, when compared to medically diagnosed  
538 disease, particularly because some studies indicated that 80% of infected people in  
539 Mozambique were asymptomatic (13); six in seven COVID-19 infections went undetected  
540 in Africa (26), and that 75% of infected people in India were asymptomatic (27).

541 With regards to hardships imposed to people and their households by the pandemic,  
542 the study shows that the closure of educational institutions, fear of being infected, hunger,  
543 fear of death and of uncertainty of the future, and the closure of churches were the main  
544 hardships – and these responses seem expected, particularly for Manhiça and Quelimane  
545 where little or no social services exist for the most pre-COVID-9 vulnerable populations,  
546 whose suffering has increased due to Coronavirus. A study in Philippines on how COVID-19  
547 impacted vulnerable communities, reported increased lack of income opportunities and  
548 insufficient food supply that existed before COVID-19 but had worsened due to the  
549 pandemic (28). One aspect deserving further research is why people are worried about the  
550 closure of churches and of *xitique*? Is it because they want to worship their God and receive  
551 the *xitique*-related savings or they want the entertainment or socialization that is involved  
552 in the churches and in *xitique*? These research questions may be important for mitigating  
553 COVID-19 impacts because the churches are institutions that mostly welcome suffering  
554 people and provide them with psychological and social strength that can improve the  
555 quality of their lives (29). Similarly, *xitique* provides the means for income savings and  
556 socialization not only for the least privileged, but also for relatively prosperous groups of  
557 individuals (20).

558

559

560

561

562

563

564

## 565        **5. CONCLUSIONS**

566        The awareness about Coronavirus was high both in Manhiça and in Quelimane districts  
567        (98.7% of participants had heard of Coronavirus), although the term COVID-19 was not as  
568        popular as that of Coronavirus (89.2%). Most participants knew about the disease and its  
569        transmission and prevention dynamics, but the level of understanding of anti-COVID-19  
570        measures was low, as measured by the higher proportion of respondents that could not  
571        define the key measures accurately or fairly and of those who said that did not know how  
572        to define these measures. These low levels of perceptions suggest that the messages may  
573        not have been transmitted in an explanatory way enough for the general population to  
574        digest, particularly because some terms and rules were changing constantly over time,  
575        which may have confused the population.

576                The level of compliance with anti-COVID-19 measures was low (below 50% in most  
577        of the indicators used in this study) even for groups of individuals or of households that  
578        one would expect to find higher levels of compliance, such as urban population and  
579        households that have piped water. The measures that most people failed to comply with  
580        are social distancing within the household (77.4% of respondents said that they could not  
581        comply with it at all), followed by avoiding touching the mouth, nose, and eyes; staying at  
582        home, and frequent hand washing. The ratio of face masks per person aged 6 years or more  
583        is too low (1 mask per person), which suggests that people may be using the same mask  
584        for longer periods and/or repeatedly without replacing it, which is particularly worrying  
585        when considering that most people were using cloth masks whose efficacy is lower than  
586        medical masks. Structural and personal factors may have contributed for this lower  
587        compliance as most people live on daily-income activities and even those with a monthly  
588        income had to go for work using crowded public transports. This indicates that these



589 measures could have been followed better by the population if the government had  
590 invested on public transports system to reduce overcrowding in the bus-stops and within  
591 the public transport system. There is a need to respond to these findings with provision of  
592 more detailed information which way increase the people's awareness and adherence to  
593 the efforts to fight this pandemic.

594

## 595 **DECLARATIONS**

### 596 **Ethics approval and consent to participate**

597 This study was reviewed and approved by the CISM's Internal Scientific Committee (CCI)  
598 and CISM's Internal Bioethics Committee (CIBS) (approval ref. CIBS-CISM/028/2020).  
599 Before starting the interview, each participant was informed about the study objectives  
600 and procedures and the voluntary nature of his/her participation through information read  
601 out from a participant's information sheet. Participants were enrolled in the survey after  
602 obtaining their oral informed consent, which was voice-recorded (not paper-based  
603 consents) to minimize the risk of COVID-19 transmission associated with exchanging papers  
604 and pens or stamps for finger print between fieldworkers and participants.

### 605 **Consent for publication**

606 The participant's information sheet requested permission for publication of the data  
607 collected in a non-individualized manner.

### 608 **Availability of data**

609 These data are not openly accessible in a web address, but they may be obtained through  
610 a formal request sent to Godifre Capinga ([godifre.capinga@manhica.net](mailto:godifre.capinga@manhica.net)), accompanied by  
611 a proposal that will be analysed by CISM's internal scientific and ethical committees.

612           **Competing interests**

613    The authors declare that they have no competing interests.

614           **Funding**

615    The core funding for CISM's activities comes from the Spanish Agency for International  
616    Development and Cooperation. The survey in Manhiça was funded from a competitive  
617    grant from Fundo Nacional de Investigaçãõ de Moçambique, while in Quelimane it was  
618    funded by the Bill and Melinda Gates Foundation through the Emory University, within the  
619    CHAMPS Network project.

620

621           **Authors' contributions**

622    AN: Participated in the study design and fieldwork, supported in the data cleaning and he  
623    conducted the analysis and interpretation of the data, and wrote this article;

624           AM: Participated in the study design and in the implementation of field activities and  
625    supervision of data collection, and contributed to the writing of this article;

626           FA: Participated in the study design and in the implementation of field activities and  
627    contributed to the writing of this article;

628           AH: Participated in the data management, including data processing and cleaning;

629           TM: Participated in the data management, including data processing and cleaning;

630           ArsN: Participated in the design of the study and supported the digitalization of the  
631    questionnaires and data cleaning, and contributed to the writing of this article;

632           QB: Contributed to the writing of this article;

633           CS: Contributed to the writing of this article;

634           IM: Contributed to the writing of this article;

635 KM: Conceived the study, participated in the study design interpretation of results  
636 and writing of this article;

637 All authors read and approved the final manuscript.

### 638 **Acknowledgements**

639 The authors would like to thank the community and the community leaders, the members  
640 of the Community Advisory Board and the local authorities, including the District Health  
641 Authorities, the District Governments and the Municipal Authorities in Manhiça and  
642 Quelimane, and all our national and international partners for their dedication and  
643 collaboration.

644

645

646

### 647 **REFERENCES**

- 648 1. Cucinotta D, Vanelli M. WHO Declares COVID-19 a Pandemic. *Acta Biomed.*  
649 2020;19(1):157–60.
- 650 2. WHO. The World Health Organization and Wikimedia Foundation expand access to trusted  
651 information about COVID-19 on Wikipedia [Internet]. 2020. Available from:  
652 [https://www.who.int/news/item/22-10-2020-the-world-health-organization-and-](https://www.who.int/news/item/22-10-2020-the-world-health-organization-and-wikimedia-foundation-expand-access-to-trusted-information-about-covid-19-on-wikipedia)  
653 [wikimedia-foundation-expand-access-to-trusted-information-about-covid-19-on-wikipedia](https://www.who.int/news/item/22-10-2020-the-world-health-organization-and-wikimedia-foundation-expand-access-to-trusted-information-about-covid-19-on-wikipedia)
- 654 3. Bedford J, Enria D, Giesecke J, Heymann DL, Ihekweazu C, Kobinger G, et al. COVID-19:  
655 towards controlling of a pandemic. *Lancet* [Internet]. 2020 Mar;395(10229):1015–8.  
656 Available from: <https://linkinghub.elsevier.com/retrieve/pii/S0140673620306735>
- 657 4. Republica A da. Boletim da Republica: Decreto Presidencial n.º 11/2020, de 30 de Março  
658 que Decreta o Estado de Emergência. Maputo; 2020 p. 0–1.
- 659 5. Lusa. Vendedores informais de Maputo têm de escolher entre a fome e a doença; 31 de  
660 Marco 2020. 2020 Mar 31; Available from: [https://www.rtp.pt/noticias/covid-](https://www.rtp.pt/noticias/covid-19/vendedores-informais-de-maputo-tem-de-escolher-entre-a-fome-e-a-doenca_n1217054)  
661 [19/vendedores-informais-de-maputo-tem-de-escolher-entre-a-fome-e-a-](https://www.rtp.pt/noticias/covid-19/vendedores-informais-de-maputo-tem-de-escolher-entre-a-fome-e-a-doenca_n1217054)  
662 [doenca\\_n1217054](https://www.rtp.pt/noticias/covid-19/vendedores-informais-de-maputo-tem-de-escolher-entre-a-fome-e-a-doenca_n1217054)
- 663 6. Dahab M, Van Zandvoort K, Flasche S, Warsame A, Ratnayake R, Favas C, et al. COVID-19  
664 control in low-income settings and displaced populations: What can realistically be done?  
665 *Confl Health.* 2020;14(1).

- 666 7. Munguambe K, Maixenchs M, Anselmo R, Blevins J, Ordi J, Mandomando I, et al. Consent  
667 to minimally invasive tissue sampling procedures in children in Mozambique: A mixed-  
668 methods study. Hossain MB, editor. PLoS One [Internet]. 2021 Nov 8;16(11):e0259621.  
669 Available from: <https://dx.plos.org/10.1371/journal.pone.0259621>
- 670 8. INE IN de E. QUADRO 1. POPULAÇÃO RECENSEADA POR ÁREA DE RESIDÊNCIA E  
671 CATEGORIA CENSITÁRIA, SEGUNDO SEXO E IDADE. PROVÍNCIA DA ZAMBEZIA, 2017  
672 [Internet]. 2022. Available from: [http://www.ine.gov.mz/iv-rgph-2017/zambezia/quadro-  
673 1-populacao-recenseada-por-area-de-residencia-e-categoria-censitaria-segundo-sexo-e-  
674 idade-provincia-da-zambezia-2017.xlsx/view](http://www.ine.gov.mz/iv-rgph-2017/zambezia/quadro-1-populacao-recenseada-por-area-de-residencia-e-categoria-censitaria-segundo-sexo-e-idade-provincia-da-zambezia-2017.xlsx/view)
- 675 9. Nhacolo A, Jamisse E, Augusto O, Matsena T, Hunguana A, Mandomando I, et al. Cohort  
676 profile update: Manhiça health and demographic surveillance system (HDSS) of the  
677 Manhiça health research centre (CISM). Int J Epidemiol [Internet]. 2021 Jan 16;1–8.  
678 Available from: [https://academic.oup.com/ije/advance-  
679 article/doi/10.1093/ije/dyaa218/6102235](https://academic.oup.com/ije/advance-article/doi/10.1093/ije/dyaa218/6102235)
- 680 10. GADM. Database of Global Administrative Areas [Internet]. 2022 [cited 2022 Apr 11].  
681 Available from: <https://gadm.org/maps.html>
- 682 11. WHO, UNICEF, JMP. Progress on Drinking Water, Sanitation and Hygiene: 2017. Vol. 33,  
683 Food and Chemical Toxicology. 2017.
- 684 12. Fleiss JL, Levin B, Paik MC. Statistical Methods for Rates and Proportions [Internet].  
685 Hoboken, NJ, USA: John Wiley & Sons, Inc.; 2003. (Wiley Series in Probability and  
686 Statistics). Available from: <http://doi.wiley.com/10.1002/0471445428>
- 687 13. MISAU. Manual de prevencao da COVID-19 [Internet]. Maputo; 2020. Available from:  
688 [https://www.misau.gov.mz/index.php/manuais-e-material-  
689 educativo?download=322:manual-de-prevencao-a-covid-19](https://www.misau.gov.mz/index.php/manuais-e-material-educativo?download=322:manual-de-prevencao-a-covid-19)
- 690 14. CDC. Handwashing in Communities: Clean Hands Save Lives [Internet]. 2020. Available  
691 from: <https://www.cdc.gov/handwashing/index.html>
- 692 15. WHO. Mask use in the context of COVID-19. World Heal Organ [Internet].  
693 2020;(December):1–10. Available from: [https://www.who.int/publications/i/item/advice-  
694 on-the-use-of-masks-in-the-community-during-home-care-and-in-healthcare-settings-in-  
695 the-context-of-the-novel-coronavirus-\(2019-ncov\)-outbreak](https://www.who.int/publications/i/item/advice-on-the-use-of-masks-in-the-community-during-home-care-and-in-healthcare-settings-in-the-context-of-the-novel-coronavirus-(2019-ncov)-outbreak)
- 696 16. CDC. COVID-19: Quarantine vs. Isolation. 2020;317422.
- 697 17. StataCorp. Stata 14.2 Statistics/Data Analysis. Texas: StataCorp LP; 2015.
- 698 18. INE IN de E. II Recenseamento geral da população e habitação. Resultados definitivos.  
699 Maputo; 1999.
- 700 19. Pública MM da AE e F. Diagnóstico integrado de infraestruturas e serviços básicos para os  
701 municípios da província de Zambézia: Relatório de diagnóstico do Município de Quelimane  
702 [Internet]. Quelimane; 2020. Available from:  
703 [https://www.pdul.gov.mz/content/download/162/881/file/DIISB\\_Quelimane\\_EIII.pdf](https://www.pdul.gov.mz/content/download/162/881/file/DIISB_Quelimane_EIII.pdf)
- 704 20. Trindade CC. Convívio e solidariedade: práticas de xitique em Moçambique. In: XI  
705 Congresso Luso Afro Brasileiro de Ciencias Sociais Diversidades e Des(igualdades)

- 706 [Internet]. Salvador: Universidade Federal de Bahia; 2011. Available from:  
707 <https://silo.tips/download/convivio-e-solidariedade-praticas-de-xitique-em-moambique>
- 708 21. Silva TC e. A organização dos trabalhadores do sector informal dos mercados de Maputo e  
709 sua acção na promoção de melhores condições de vida e de trabalho O papel da  
710 Associação dos Operadores e Trabalhadores do Sector Informal - ASSOTSI [Internet].  
711 Genebra; 2005. Available from: [https://www.ilo.org/wcmsp5/groups/public/---europe/---ro-geneva/---ilo-lisbon/documents/publication/wcms\\_714572.pdf](https://www.ilo.org/wcmsp5/groups/public/---europe/---ro-geneva/---ilo-lisbon/documents/publication/wcms_714572.pdf)  
712
- 713 22. Elliott R. Coronavirus in Africa: A study of the knowledge and perceptions of coronavirus  
714 (COVID-19) in South Africa, Kenya, and Nigeria [Internet]. 2020. Available from:  
715 <https://www.geopoll.com/blog/coronavirus-africa/>
- 716 23. Magaço A, Munguambe K, Nhacolo A, Ambrósio C, Nhacolo F, Cossa S, et al. Challenges  
717 and needs for social behavioural research and community engagement activities during  
718 the COVID-19 pandemic in rural Mozambique. *Glob Public Health* [Internet]. 2021 Jan  
719 2;16(1):153–7. Available from:  
720 <https://www.tandfonline.com/doi/full/10.1080/17441692.2020.1839933>
- 721 24. Chen X, Chen H. Differences in Preventive Behaviors of COVID-19 between Urban and  
722 Rural Residents: Lessons Learned from A Cross-Sectional Study in China. *Int J Environ Res*  
723 *Public Health* [Internet]. 2020 Jun 20;17(12):4437. Available from:  
724 <https://www.mdpi.com/1660-4601/17/12/4437>
- 725 25. Kayrite QQ, Hailu AA, Tola TN, Adula TD, Lambyo SH. Compliance with COVID-19  
726 Preventive and Control Measures among Food and Drink Establishments in Bench-Sheko  
727 and West-Omo Zones, Ethiopia, 2020. *Int J Gen Med* [Internet]. 2020 Nov;Volume  
728 13:1147–55. Available from: <https://www.dovepress.com/compliance-with-covid-19-preventive-and-control-measures-among-food-an-peer-reviewed-article-IJGM>  
729
- 730 26. WHO. Six in seven COVID-19 infections go undetected in Africa [Internet]. 2021 [cited 2022  
731 May 29]. Available from: <https://www.afro.who.int/news/six-seven-covid-19-infections-go-undetected-africa>  
732
- 733 27. Dayanand D, Irudhayanathan I, Kundu D, Manesh A, Abraham V, Abhilash KP, et al.  
734 Community seroprevalence and risk factors for SARS-CoV-2 infection in different  
735 subpopulations in Vellore, India, and their implications for future prevention. *Int J Infect*  
736 *Dis* [Internet]. 2022 Mar;116:138–46. Available from:  
737 <https://linkinghub.elsevier.com/retrieve/pii/S1201971221012558>
- 738 28. Fallesen D. How COVID-19 impacted vulnerable communities in the Philippines [Internet].  
739 2021. Available from: <https://blogs.worldbank.org/eastasiapacific/how-covid-19-impacted-vulnerable-communities-philippines>  
740
- 741 29. Chifeche V, Dreyer Y. Faith communities, youth and development in Mozambique. *HTS*  
742 *Teol Stud / Theol Stud* [Internet]. 2019 Nov 29;75(4). Available from:  
743 <http://www.hts.org.za/index.php/HTS/article/view/5450>  
744

**Figure 1.** Location and administrative division of Manhiça and Quelimane districts.

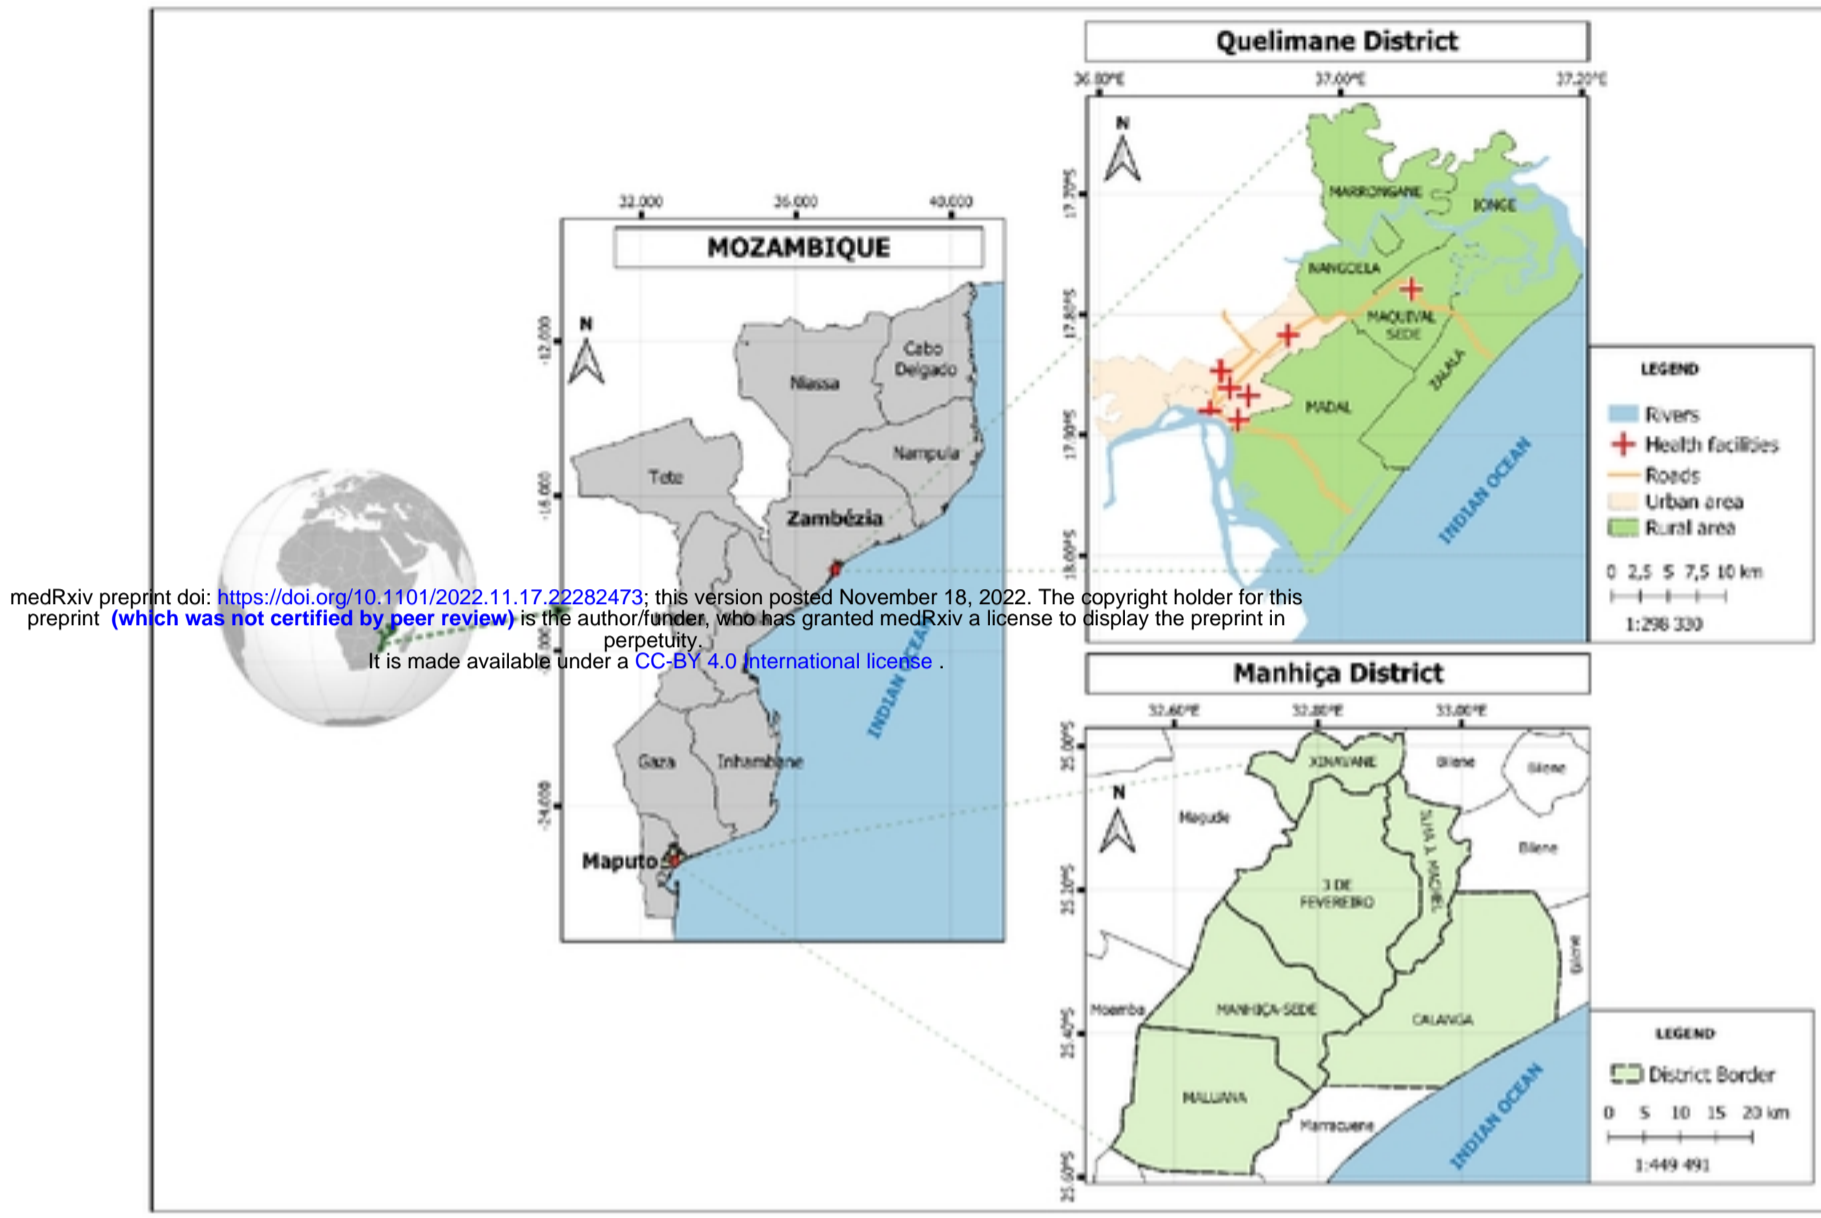

medRxiv preprint doi: <https://doi.org/10.1101/2022.11.17.22282473>; this version posted November 18, 2022. The copyright holder for this preprint (which was not certified by peer review) is the author/funder, who has granted medRxiv a license to display the preprint in perpetuity. It is made available under a [CC-BY 4.0 International license](https://creativecommons.org/licenses/by/4.0/).

Source: Manhiça and Quelimane HDSS databases (2022) and (10).
